# Supplementary material for: Association of phthalates, parabens and phenols found in personal care products with pubertal timing in girls and boys
Source: Oxford University Press journal article supplement (doi:10.1093/humrep/dey337), 2018-10-24
Supplement: dey337supplement_figure1.pdf [file dey337supplement_figure1.pdf]

### A Girls – Prenatal Exposure

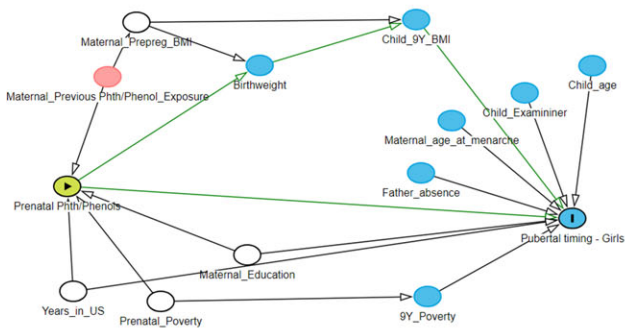

### B Girls – Peripubertal Exposure

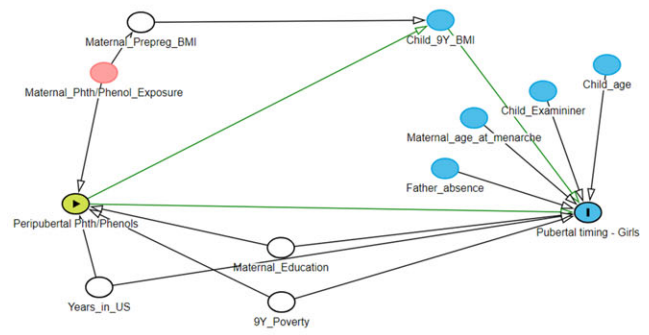

### C Boys – Prenatal Exposure

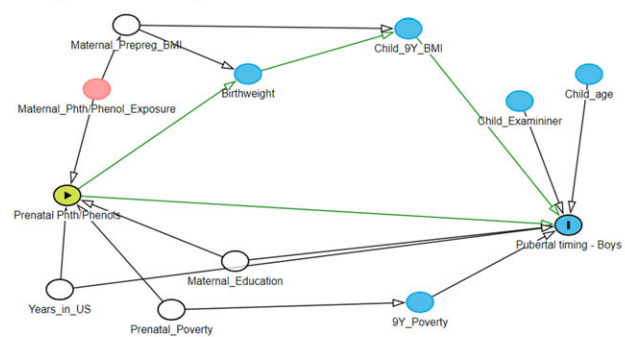

### D Boys – Peripubertal Exposure

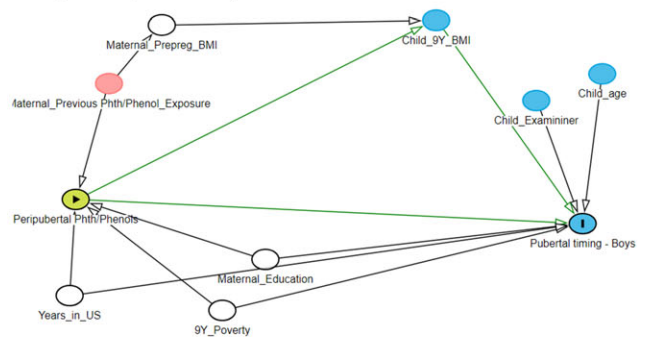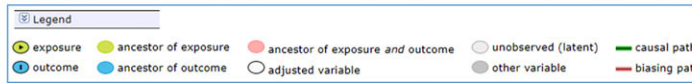

**Supplementary Figure S1** Directed acyclic graphs (DAGs) of role of covariates in hypothesized association of urinary phthalate and phenol concentrations and timing of puberty in girls (A) and boys (B).
