# Supplementary material for: Association of phthalates, parabens and phenols found in personal care products with pubertal timing in girls and boys
Source: Oxford University Press journal article supplement (doi:10.1093/humrep/dey337), 2018-10-24
Supplement: dey337supplement_table1.pdf [file dey337supplement_table1.pdf]

**Supplementary Table S1** Adjusted<sup>a</sup> mean shift (95% confidence intervals) in age at pubertal milestones in girls and boys associated with different quartiles of prenatal and childhood urinary biomarker concentrations.

| Biomarker                            | Girls                                  |                                        |                                 | Boys                                    |                                        |
|--------------------------------------|----------------------------------------|----------------------------------------|---------------------------------|-----------------------------------------|----------------------------------------|
|                                      | Thelarche (B2+)<br>Mean shift (months) | Pubarche (PH2+)<br>Mean shift (months) | Menarche<br>Mean shift (months) | Gonadarche (G2+)<br>Mean shift (months) | Pubarche (PH2+)<br>Mean shift (months) |
| Prenatal concentrations <sup>b</sup> |                                        |                                        |                                 |                                         |                                        |
| MEP                                  |                                        |                                        |                                 |                                         |                                        |
| Q1                                   | Ref                                    | Ref <sup>d</sup>                       | Ref                             | Ref                                     | Ref                                    |
| Q2                                   | -3.8 (-9.0, 1.6)                       | 1.3 (-4.1, 7.1)                        | -0.8 (-5.1, 3.6)                | 0.9 (-6.6, 8.9)                         | -3.4 (-9.6, 3.1)                       |
| Q3                                   | -4.2 (-9.3, 1.2)                       | -2.5 (-8.0, 3.2)                       | -2.1 (-6.3, 2.3)                | 1.5 (-5.9, 9.3)                         | -3.7 (-9.6, 2.5)                       |
| Q4                                   | -5.2 (-10.3, 0.1)                      | -6.1 (-11.3, -0.6)*                    | -1.4 (-5.7, 3.1)                | -3.8 (-11.1, 3.9)                       | -4.5 (-10.3, 1.5)                      |
| MBP                                  |                                        |                                        |                                 |                                         |                                        |
| Q1                                   | Ref                                    | Ref                                    | Ref                             | Ref                                     | Ref                                    |
| Q2                                   | -0.5 (-6.3, 5.7)                       | -0.6 (-6.4, 5.6)                       | -2.1 (-6.5, 2.5)                | -3.7 (-10.6, 3.6)                       | -0.2 (-6.4, 6.2)                       |
| Q3                                   | 0.1 (-5.8, 6.3)                        | 0.5 (-5.5, 6.8)                        | -2.1 (-6.8, 2.7)                | -0.2 (-7.1, 7.1)                        | -3.2 (-8.8, 2.6)                       |
| Q4                                   | -0.6 (-6.5, 5.6)                       | 1.6 (-4.5, 8.0)                        | -2.8 (-7.3, 2.0)                | 5.2 (-2.2, 13.1)                        | 0.7 (-5.4, 7.1)                        |
| MiBP                                 |                                        |                                        |                                 |                                         |                                        |
| Q1                                   | Ref                                    | Ref                                    | Ref                             | Ref                                     | Ref                                    |
| Q2                                   | -1.0 (-6.6, 4.9)                       | -3.2 (-8.9, 2.8)                       | 0.1 (-4.6, 5.0)                 | -5.0 (-11.7, 2.2)                       | 1.8 (-4.1, 8.0)                        |
| Q3                                   | 6.5 (1.0, 12.3)*                       | 2.9 (-2.9, 8.9)                        | -1.3 (-5.6, 3.1)                | -4.5 (-11.9, 3.4)                       | 2.6 (-4.3, 9.7)                        |
| Q4                                   | -2.6 (-7.8, 2.8)                       | -4.0 (-9.4, 1.7)                       | -1.5 (-5.8, 3.0)                | -4.5 (-11.6, 3.0)                       | -1.7 (-7.5, 4.4)                       |
| Triclosan                            |                                        |                                        |                                 |                                         |                                        |
| Q1                                   | Ref                                    | Ref                                    | Ref <sup>d</sup>                | Ref                                     | Ref                                    |
| Q2                                   | 2.1 (-3.6, 8.2)                        | 3.7 (-2.1, 9.9)                        | 3.0 (-1.4, 7.6)                 | 2.2 (-5.1, 9.9)                         | 3.2 (-3.0, 9.6)                        |
| Q3                                   | 1.2 (-4.6, 7.3)                        | -0.4 (-6.5, 6.0)                       | -1.4 (-5.7, 2.9)                | -2.5 (-9.2, 4.6)                        | 0.2 (-5.2, 5.9)                        |
| Q4                                   | -2.4 (-7.7, 3.3)                       | -1.1 (-6.8, 4.9)                       | -4.2 (-8.1, -0.2)*              | -4.9 (-11.6, 2.2)                       | -3.8 (-9.1, 1.7)                       |
| Benzophenone-3                       |                                        |                                        |                                 |                                         |                                        |
| Q1                                   | Ref                                    | Ref                                    | Ref                             | Ref                                     | Ref                                    |
| Q2                                   | -0.1 (-6.2, 6.3)                       | 3.6 (-2.8, 10.3)                       | -3.1 (-7.5, 1.4)                | 0.6 (-6.3, 7.9)                         | -2.9 (-8.5, 3.0)                       |
| Q3                                   | -3.3 (-8.9, 2.7)                       | 7.2 (0.8, 13.8)*                       | 1.8 (-2.6, 6.4)                 | -5.0 (-11.4, 1.8)                       | 3.2 (-2.8, 9.5)                        |
| Q4                                   | -0.7 (-6.2, 4.9)                       | 3.5 (-2.3, 9.5)                        | -3.1 (-7.1, 1.0)                | 10.4 (2.0, 19.3)*                       | 2.1 (-4.9, 9.4)                        |
| Methyl paraben                       |                                        |                                        |                                 |                                         |                                        |
| Q1                                   | Ref                                    | Ref                                    | Ref                             | Ref                                     | Ref                                    |
| Q2                                   | 2.1 (-3.6, 8.2)                        | 0.0 (-6.0, 6.3)                        | 2.3 (-2.2, 7.0)                 | 1.9 (-5.9, 10.2)                        | 2.7 (-3.4, 9.1)                        |
| Q3                                   | 2.4 (-3.2, 8.3)                        | 5.9 (0.0, 12.1)                        | 2.5 (-1.6, 6.8)                 | 3.1 (-5.2, 11.9)                        | -1.9 (-8.1, 4.5)                       |
| Q4                                   | 0.9 (-4.5, 6.6)                        | 0.4 (-5.2, 6.3)                        | -3.2 (-7.2, 1.0)                | 0.5 (-7.1, 8.6)                         | 0.9 (-5.1, 7.0)                        |
| Propyl paraben                       |                                        |                                        |                                 |                                         |                                        |
| Q1                                   | Ref                                    | Ref                                    | Ref                             | Ref                                     | Ref                                    |
| Q2                                   | 1.9 (-3.6, 7.6)                        | 5.6 (-0.3, 11.7)                       | 0.0 (-4.1, 4.3)                 | -4.2 (-11.4, 3.5)                       | 2.5 (-3.7, 8.9)                        |
| Q3                                   | -2.2 (-7.5, 3.4)                       | -0.2 (-6.0, 5.8)                       | -1.3 (-5.6, 3.1)                | 2.8 (-4.7, 10.7)                        | 1.6 (-4.4, 7.9)                        |
| Q4                                   | 3.2 (-2.7, 9.3)                        | 4.2 (-1.9, 10.5)                       | -2.1 (-6.4, 2.4)                | -4.0 (-10.9, 3.4)                       | 1.7 (-4.3, 7.9)                        |
| 2,4-dichlorophenol                   |                                        |                                        |                                 |                                         |                                        |
| Q1                                   | Ref                                    | Ref                                    | Ref                             | Ref                                     | Ref                                    |
| Q2                                   | 0.5 (-5.1, 6.3)                        | 1.4 (-4.4, 7.6)                        | -1.2 (-5.4, 3.1)                | 8.7 (0.5, 17.3)*                        | 0.0 (-6.3, 6.5)                        |

Continued

**Supplementary Table SI** *Continued*

| Biomarker                                | Girls                                  |                                        |                                 | Boys                                    |                                        |
|------------------------------------------|----------------------------------------|----------------------------------------|---------------------------------|-----------------------------------------|----------------------------------------|
|                                          | Thelarche (B2+)<br>Mean shift (months) | Pubarche (PH2+)<br>Mean shift (months) | Menarche<br>Mean shift (months) | Gonadarche (G2+)<br>Mean shift (months) | Pubarche (PH2+)<br>Mean shift (months) |
| Q3                                       | -3.7 (-9.2, 2.2)                       | -0.7 (-6.8, 5.7)                       | -3.3 (-7.5, 1.1)                | -3.1 (-10.0, 4.1)                       | -1.5 (-7.3, 4.6)                       |
| Q4                                       | -3.8 (-9.3, 1.9)                       | -1.0 (-6.9, 5.1)                       | -3.3 (-7.5, 1.0)                | -0.8 (-7.6, 6.4)                        | -3.3 (-9.0, 2.7)                       |
| 2,5-dichlorophenol                       |                                        |                                        |                                 |                                         |                                        |
| Q1                                       | Ref                                    | Ref                                    | Ref                             | Ref                                     | Ref                                    |
| Q2                                       | 0.0 (-5.8, 6.1)                        | 0.7 (-5.3, 7.0)                        | -1.7 (-6.0, 2.8)                | 4.4 (-3.2, 12.6)                        | 6.7 (0.3, 13.3)*                       |
| Q3                                       | 1.0 (-4.6, 7.0)                        | -0.6 (-6.3, 5.4)                       | -2.3 (-6.4, 2.1)                | 0.0 (-7.3, 7.8)                         | 1.0 (-4.8, 7.1)                        |
| Q4                                       | -2.1 (-7.5, 3.6)                       | 0.3 (-5.4, 6.4)                        | -2.5 (-6.6, 1.6)                | 0.4 (-7.1, 8.3)                         | 3.2 (-2.9, 9.5)                        |
| Peripubertal concentrations <sup>c</sup> |                                        |                                        |                                 |                                         |                                        |
| Triclosan                                |                                        |                                        |                                 |                                         |                                        |
| Q1                                       | Ref                                    | Ref <sup>d</sup>                       | Ref                             | Ref                                     | Ref                                    |
| Q2                                       | -0.4 (-6.7, 6.2)                       | 3.0 (-3.1, 9.4)                        | 4.1 (-0.9, 9.3)                 | -5.2 (-11.5, 1.4)                       | -1.9 (-7.7, 4.1)                       |
| Q3                                       | 0.6 (-5.5, 7.1)                        | 5.1 (-0.8, 11.3)                       | 2.4 (-2.2, 7.2)                 | -2.1 (-8.9, 5.2)                        | -2.8 (-8.6, 3.2)                       |
| Q4                                       | -0.2 (-6.2, 6.1)                       | 6.1 (0.0, 12.4)*                       | 2.1 (-2.6, 6.9)                 | -3.8 (-10.6, 3.4)                       | 1.0 (-5.4, 7.6)                        |
| Benzophenone-3                           |                                        |                                        |                                 |                                         |                                        |
| Q1                                       | Ref                                    | Ref                                    | Ref                             | Ref                                     | Ref                                    |
| Q2                                       | -2.1 (-7.8, 3.9)                       | -0.1 (-5.8, 5.9)                       | -1.6 (-6.1, 3.0)                | 0.3 (-6.8, 7.8)                         | -2.0 (-7.9, 4.2)                       |
| Q3                                       | -6.3 (-11.9, -0.3)*                    | -5.4 (-11.0, 0.4)                      | -0.8 (-5.6, 4.1)                | -4.9 (-11.2, 1.7)                       | -5.3 (-10.9, 0.5)                      |
| Q4                                       | -1.0 (-6.8, 5.1)                       | 0.1 (-5.6, 6.0)                        | -1.2 (-5.8, 3.5)                | -3.4 (-10.9, 4.6)                       | -4.4 (-10.9, 2.4)                      |
| Methyl paraben                           |                                        |                                        |                                 |                                         |                                        |
| Q1                                       | Ref <sup>d</sup>                       | Ref <sup>d</sup>                       | Ref <sup>d</sup>                | Ref <sup>d</sup>                        | Ref <sup>d</sup>                       |
| Q2                                       | 3.0 (-3.1, 9.5)                        | 1.2 (-4.6, 7.3)                        | -4.9 (-9.4, -0.2)*              | 2.8 (-4.1, 10.1)                        | 4.8 (-1.2, 11.0)                       |
| Q3                                       | -3.4 (-8.9, 2.5)                       | -1.3 (-6.7, 4.3)                       | -3.7 (-7.9, 0.6)                | -0.5 (-7.8, 7.3)                        | 8.5 (1.6, 15.7)*                       |
| Q4                                       | -4.5 (-9.8, 1.1)                       | -6.4 (-11.6, -1.0)*                    | -6.1 (-10.3, -1.7)**            | -0.8 (-8.3, 7.3)                        | 6.3 (-0.4, 13.3)                       |
| Propyl paraben                           |                                        |                                        |                                 |                                         |                                        |
| Q1                                       | Ref                                    | Ref                                    | Ref                             | Ref <sup>d</sup>                        | Ref                                    |
| Q2                                       | 1.1 (-4.8, 7.5)                        | 2.6 (-3.4, 8.9)                        | -0.3 (-5.0, 4.7)                | -0.3 (-6.9, 6.7)                        | -3.2 (-8.8, 2.6)                       |
| Q3                                       | 1.7 (-4.5, 8.3)                        | 1.9 (-3.8, 7.8)                        | -0.3 (-4.9, 4.4)                | -2.1 (-8.6, 4.7)                        | 4.2 (-2.2, 10.9)                       |
| Q4                                       | -2.9 (-8.3, 2.7)                       | -4.9 (-10.0, 0.4)                      | -3.8 (-8.0, 0.5)                | -9.8 (-16.2, -3.2)**                    | -3.1 (-9.0, 3.1)                       |
| 2,4-dichlorophenol                       |                                        |                                        |                                 |                                         |                                        |
| Q1                                       | Ref                                    | Ref                                    | Ref                             | Ref                                     | Ref                                    |
| Q2                                       | -1.7 (-7.9, 4.8)                       | 1.7 (-4.6, 8.3)                        | -1.3 (-6.2, 3.8)                | -7.1 (-13.2, -0.8)*                     | -1.9 (-7.7, 4.1)                       |
| Q3                                       | 3.1 (-3.8, 10.4)                       | 2.8 (-3.7, 9.6)                        | 0.5 (-4.6, 5.8)                 | -3.3 (-10.3, 4.1)                       | 1.4 (-5.0, 8.2)                        |
| Q4                                       | 1.2 (-5.2, 8.1)                        | 3.1 (-3.4, 10.1)                       | -1.9 (-6.6, 3.0)                | -5.3 (-12.0, 1.7)                       | -0.6 (-6.6, 5.7)                       |
| 2,5-dichlorophenol                       |                                        |                                        |                                 |                                         |                                        |
| Q1                                       | Ref                                    | Ref <sup>d</sup>                       | Ref                             | Ref                                     | Ref                                    |
| Q2                                       | -5.0 (-10.6, 1.0)                      | -2.8 (-8.3, 3.0)                       | -1.7 (-6.1, 2.9)                | 4.5 (-3.1, 12.5)                        | 0.3 (-6.0, 6.9)                        |
| Q3                                       | -4.9 (-10.3, 0.7)                      | -1.5 (-6.9, 4.0)                       | -2.9 (-7.3, 1.6)                | 6.4 (-1.7, 14.9)                        | 3.0 (-3.6, 9.9)                        |
| Q4                                       | 1.9 (-3.9, 7.9)                        | 7.3 (1.8, 13.1)**                      | 3.2 (-1.6, 8.2)                 | 3.6 (-4.2, 11.9)                        | 2.0 (-4.9, 9.2)                        |

<sup>a</sup>Adjusted for maternal education, years in US, maternal pre-pregnancy BMI, and family poverty (during pregnancy or at 9 Y, respectively).

<sup>b</sup>Average of creatinine-corrected concentrations in two urine samples collected during pregnancy.

<sup>c</sup>Creatinine-corrected concentrations in one urine sample collected at 9 years of age.

<sup>d</sup>P < 0.05 for test of trend across quartiles.
