# Supplementary material for: Association of phthalates, parabens and phenols found in personal care products with pubertal timing in girls and boys
Source: Oxford University Press journal article supplement (doi:10.1093/humrep/dey337), 2018-10-24
Supplement: dey337supplement_table2.pdf [file dey337supplement_table2.pdf]

**Supplementary Table SII Results of mediation analysis using Paramed to examine indirect effects of childhood overweight/obese status on association of prenatal biomarkers (dichotomized as high versus low) on pubertal outcomes.**

|                          | Natural direct effect |         | Natural indirect effect |         | Total effect        |         |
|--------------------------|-----------------------|---------|-------------------------|---------|---------------------|---------|
|                          | $\beta$ (95% CI)      | P-value | $\beta$ (95% CI)        | P-value | $\beta$ (95% CI)    | P-value |
| Girls—breast development |                       |         |                         |         |                     |         |
| MEP                      | 0.05 (−0.31, 0.42)    | 0.77    | −0.07 (−0.16, 0.02)     | 0.11    | −0.02 (−0.40, 0.36) | 0.92    |
| MBP                      | −0.07 (−0.42, 0.28)   | 0.70    | −0.03 (−0.10, 0.03)     | 0.33    | −0.10 (−0.46, 0.26) | 0.57    |
| MiBP                     | 0.16 (−0.20, 0.52)    | 0.39    | 0.02 (−0.06, 0.11)      | 0.60    | 0.18 (−0.20, 0.57)  | 0.36    |
| Triclosan                | −0.18 (−0.54, 0.19)   | 0.35    | 0.01 (−0.04, 0.06)      | 0.74    | −0.17 (−0.53, 0.20) | 0.37    |
| Benzophenone-3           | 0.01 (−0.35, 0.37)    | 0.96    | −0.01 (−0.09, 0.06)     | 0.72    | 0.00 (−0.37, 0.37)  | 0.99    |
| Methyl paraben           | 0.04 (−0.33, 0.40)    | 0.85    | −0.03 (−0.09, 0.03)     | 0.29    | 0.00 (−0.37, 0.37)  | 0.99    |
| Propyl paraben           | −0.16 (−0.52, 0.20)   | 0.39    | −0.03 (−0.08, 0.03)     | 0.36    | −0.18 (−0.54, 0.17) | 0.31    |
| 2,4-dichlorophenol       | −0.27 (−0.63, 0.09)   | 0.14    | −0.02 (−0.07, 0.04)     | 0.51    | −0.29 (−0.64, 0.07) | 0.11    |
| 2,5-dichlorophenol       | −0.06 (−0.41, 0.30)   | 0.74    | −0.02 (−0.08, 0.04)     | 0.50    | −0.08 (−0.44, 0.27) | 0.66    |
| Girls—pubic hair         |                       |         |                         |         |                     |         |
| MEP                      | −0.33 (−0.70, 0.03)   | 0.07    | −0.03 (−0.09, 0.04)     | 0.42    | −0.36 (−0.73, 0.01) | 0.06    |
| MBP                      | 0.07 (−0.29, 0.43)    | 0.69    | −0.01 (−0.04, 0.03)     | 0.61    | 0.06 (−0.30, 0.42)  | 0.73    |
| MiBP                     | −0.15 (−0.51, 0.21)   | 0.42    | 0.02 (−0.05, 0.09)      | 0.61    | −0.13 (−0.51, 0.25) | 0.50    |
| Triclosan                | −0.18 (−0.55, 0.19)   | 0.33    | 0.00 (−0.01, 0.02)      | 0.78    | −0.18 (−0.55, 0.19) | 0.34    |
| Benzophenone-3           | 0.33 (−0.02, 0.69)    | 0.07    | −0.01 (−0.06, 0.04)     | 0.72    | 0.33 (−0.03, 0.68)  | 0.08    |
| Methyl paraben           | 0.34 (−0.02, 0.70)    | 0.06    | −0.02 (−0.08, 0.03)     | 0.42    | 0.32 (−0.05, 0.68)  | 0.09    |
| Propyl paraben           | 0.14 (−0.22, 0.49)    | 0.45    | −0.02 (−0.06, 0.03)     | 0.41    | 0.12 (−0.24, 0.48)  | 0.52    |
| 2,4-dichlorophenol       | 0.04 (−0.31, 0.40)    | 0.81    | −0.01 (−0.06, 0.03)     | 0.53    | 0.03 (−0.33, 0.39)  | 0.87    |
| 2,5-dichlorophenol       | 0.06 (−0.29, 0.42)    | 0.73    | −0.01 (−0.06, 0.03)     | 0.53    | 0.05 (−0.30, 0.40)  | 0.78    |
| Girls—menarche           |                       |         |                         |         |                     |         |
| MEP                      | 0.12 (−0.16, 0.40)    | 0.38    | −0.06 (−0.13, 0.01)     | 0.11    | 0.07 (−0.23, 0.36)  | 0.66    |
| MBP                      | 0.07 (−0.20, 0.35)    | 0.60    | −0.02 (−0.06, 0.02)     | 0.37    | 0.05 (−0.22, 0.33)  | 0.71    |
| MiBP                     | 0.17 (−0.11, 0.45)    | 0.24    | 0.01 (−0.04, 0.07)      | 0.61    | 0.18 (−0.11, 0.48)  | 0.23    |
| Triclosan                | −0.24 (−0.53, 0.05)   | 0.10    | 0.00 (−0.02, 0.02)      | 0.75    | −0.24 (−0.53, 0.05) | 0.10    |
| Benzophenone-3           | 0.14 (−0.14, 0.41)    | 0.34    | −0.01 (−0.05, 0.04)     | 0.72    | 0.13 (−0.15, 0.41)  | 0.37    |
| Methyl paraben           | 0.00 (−0.29, 0.28)    | 0.98    | −0.01 (−0.05, 0.03)     | 0.52    | −0.02 (−0.30, 0.27) | 0.91    |
| Propyl paraben           | −0.12 (−0.41, 0.16)   | 0.40    | −0.01 (−0.03, 0.02)     | 0.57    | −0.13 (−0.41, 0.15) | 0.36    |
| 2,4-dichlorophenol       | −0.15 (−0.42, 0.13)   | 0.29    | −0.02 (−0.08, 0.04)     | 0.50    | −0.17 (−0.46, 0.12) | 0.26    |
| 2,5-dichlorophenol       | −0.12 (−0.40, 0.15)   | 0.37    | −0.01 (−0.06, 0.03)     | 0.51    | −0.14 (−0.41, 0.14) | 0.32    |
| Boys—genital             |                       |         |                         |         |                     |         |
| MEP                      | −0.30 (−0.74, 0.13)   | 0.17    | 0.07 (−0.02, 0.16)      | 0.15    | −0.24 (−0.70, 0.23) | 0.32    |
| MBP                      | −0.04 (−0.50, 0.41)   | 0.85    | 0.01 (−0.03, 0.05)      | 0.63    | −0.03 (−0.49, 0.42) | 0.88    |
| MiBP                     | −0.36 (−0.78, 0.06)   | 0.09    | −0.01 (−0.06, 0.03)     | 0.62    | −0.37 (−0.80, 0.05) | 0.08    |
| Triclosan                | −0.40 (−0.87, 0.07)   | 0.10    | −0.02 (−0.14, 0.10)     | 0.73    | −0.42 (−0.97, 0.13) | 0.13    |
| Benzophenone-3           | −0.03 (−0.48, 0.41)   | 0.88    | 0.04 (−0.03, 0.11)      | 0.27    | 0.01 (−0.45, 0.46)  | 0.98    |
| Methyl paraben           | −0.14 (−0.55, 0.28)   | 0.52    | 0.01 (−0.03, 0.04)      | 0.73    | −0.13 (−0.55, 0.29) | 0.54    |
| Propyl paraben           | −0.14 (−0.57, 0.30)   | 0.53    | 0.03 (−0.03, 0.09)      | 0.38    | −0.11 (−0.56, 0.34) | 0.62    |
| 2,4-dichlorophenol       | 0.00 (−0.43, 0.43)    | 0.99    | 0.02 (−0.05, 0.09)      | 0.51    | 0.02 (−0.43, 0.47)  | 0.93    |
| 2,5-dichlorophenol       | 0.09 (−0.33, 0.51)    | 0.68    | 0.02 (−0.03, 0.07)      | 0.52    | 0.11 (−0.33, 0.54)  | 0.63    |
| Boys—pubic hair          |                       |         |                         |         |                     |         |
| MEP                      | 0.05 (−0.33, 0.43)    | 0.79    | 0.00 (−0.06, 0.06)      | 0.98    | 0.05 (−0.34, 0.45)  | 0.79    |
| MBP                      | 0.12 (−0.25, 0.49)    | 0.52    | 0.01 (−0.02, 0.04)      | 0.66    | 0.13 (−0.25, 0.50)  | 0.50    |
| MiBP                     | 0.11 (−0.25, 0.48)    | 0.55    | 0.00 (−0.02, 0.03)      | 0.67    | 0.12 (−0.25, 0.49)  | 0.53    |
| Triclosan                | −0.04 (−0.39, 0.32)   | 0.84    | 0.00 (−0.01, 0.01)      | 0.84    | −0.03 (−0.39, 0.32) | 0.85    |

Continued

**Supplementary Table SII** *Continued*

|                    | <b>Natural direct effect</b>       |                | <b>Natural indirect effect</b>     |                | <b>Total effect</b>                |                |
|--------------------|------------------------------------|----------------|------------------------------------|----------------|------------------------------------|----------------|
|                    | <b><math>\beta</math> (95% CI)</b> | <b>P-value</b> | <b><math>\beta</math> (95% CI)</b> | <b>P-value</b> | <b><math>\beta</math> (95% CI)</b> | <b>P-value</b> |
| Benzophenone-3     | -0.22 (-0.58, 0.14)                | 0.23           | 0.00 (-0.01, 0.01)                 | 0.93           | -0.22 (-0.58, 0.14)                | 0.23           |
| Methyl paraben     | -0.13 (-0.51, 0.24)                | 0.48           | 0.01 (-0.03, 0.06)                 | 0.65           | -0.12 (-0.51, 0.26)                | 0.52           |
| Propyl paraben     | -0.15 (-0.51, 0.21)                | 0.41           | 0.00 (-0.03, 0.03)                 | 0.87           | -0.15 (-0.51, 0.21)                | 0.42           |
| 2,4-dichlorophenol | -0.11 (-0.46, 0.24)                | 0.53           | 0.01 (-0.02, 0.04)                 | 0.56           | -0.10 (-0.46, 0.26)                | 0.58           |
| 2,5-dichlorophenol | -0.12 (-0.48, 0.23)                | 0.49           | 0.01 (-0.03, 0.05)                 | 0.53           | -0.11 (-0.48, 0.25)                | 0.55           |
